# Supplementary material for: Identification of the occurrence and potential mechanisms of heterotopic ossification associated with 17-beta-estradiol targeting MKX by bioinformatics analysis and cellular experiments
Source: PeerJ. 2022 Jan 3;10:e12696. doi: 10.7717/peerj.12696 (PMC8734462; doi:10.7717/peerj.12696)
Supplement: Supplemental Information 2 [file peerj-10-12696-s002.xls]

## Sheet: sheet1
	Control			0.001nmol/L			0.01nmol/L
0	0.22	0.21	0.2	0.21	0.23	0.18	0.2	0.21	0.19
1	0.3	0.35	0.27	0.34	0.38	0.43	0.45	0.44	0.47
3	0.6	0.52	0.57	0.79	0.85	0.71	0.95	0.92	0.94
5	0.73	0.62	0.65	0.97	0.93	0.89	1.12	1.13	1.08
	Control			0.001nmol/L			0.01nmol/L
	AVERAGE	STDEV	n	AVERAGE	STDEV	n	AVERAGE	STDEV	n
0	0.21	0.01	3	0.206667	0.0251661	3	0.2	0.01	3
1	0.306667	0.0404145	3	0.383333	0.0450925	3	0.453333	0.0152753	3
3	0.563333	0.0404145	3	0.783333	0.0702377	3	0.936667	0.0152753	3
5	0.666667	0.0568624	3	0.93	0.04	3	1.11	0.0264575	3
p-value
0						0.841596			0.287864
1						0.0933827			0.00418107
2						0.00929251			0.000116102
3						0.00279213			0.000255527
