# Supplementary material for: Identification of the occurrence and potential mechanisms of heterotopic ossification associated with 17-beta-estradiol targeting MKX by bioinformatics analysis and cellular experiments
Source: PeerJ. 2022 Jan 3;10:e12696. doi: 10.7717/peerj.12696 (PMC8734462; doi:10.7717/peerj.12696)
Supplement: Supplemental Information 3 [file peerj-10-12696-s003.xls]

## Sheet: per
			RUNX2
		internal reference	Gene	△CT=CTtarget-gene-Ctreference-genes	△△CT=△CTexperiment -△CTcontrol-group	expanding fold=2-△△CT
ID	group	GAPDH	RUNX2
1	Control	15.32	21.06	5.74	0	1
2		15.04	21.66	6.62	0.88	0.543367
3		15.64	20.99	5.35	-0.39	1.31039
4		15.86	21.06	5.2	-0.54	1.45397
5		15.92	20.75	4.83	-0.91	1.87905
6		15.76	21.33	5.57	-0.17	1.12506
7	0.001nmol/L	16.29	20.63	4.34	-1.4	2.63902
8		15.66	20.68	5.02	-0.72	1.64718
9		15.21	20.26	5.05	-0.69	1.61328
10		15.44	20.49	5.05	-0.69	1.61328
11		15.26	20.4	5.14	-0.6	1.51572
12		15.79	20.57	4.78	-0.96	1.94531
13	0.01nmol/L	15.74	20.07	4.33	-1.41	2.65737
14		15.73	20.17	4.44	-1.3	2.46229
15		15.4	19.67	4.27	-1.47	2.77022
16		15.62	20.53	4.91	-0.83	1.77769
17		16.1	20.5	4.4	-1.34	2.53151
18		15.45	19.87	4.42	-1.32	2.49666
	RUNX2
group	average	SD	p-value
Control	1.21864	0.449998
0.001nmol/L	1.82897	0.42283	0.0359936
0.01nmol/L	2.44929	0.348287	0.0196599	0.000348791
